# Supplementary material for: The root‐invading pathogen Fusarium oxysporum targets pattern‐triggered immunity using both cytoplasmic and apoplastic effectors
Source: PubMed Central journal article supplement (PMC7496899; doi:10.1111/nph.16618), 2020-05-18
Supplement: NPH-227-1479-s001.pdf [file NPH-227-1479-s001.pdf]

New Phytologist Supporting Information:

**The root invading pathogen *Fusarium oxysporum* targets pattern-triggered immunity using both cytoplasmic and apoplastic effectors**

Nico Tintor, Misha Paauw, Martijn Rep, Frank L. W. Takken

article acceptance date: 9 April 2020.

Fig. S1

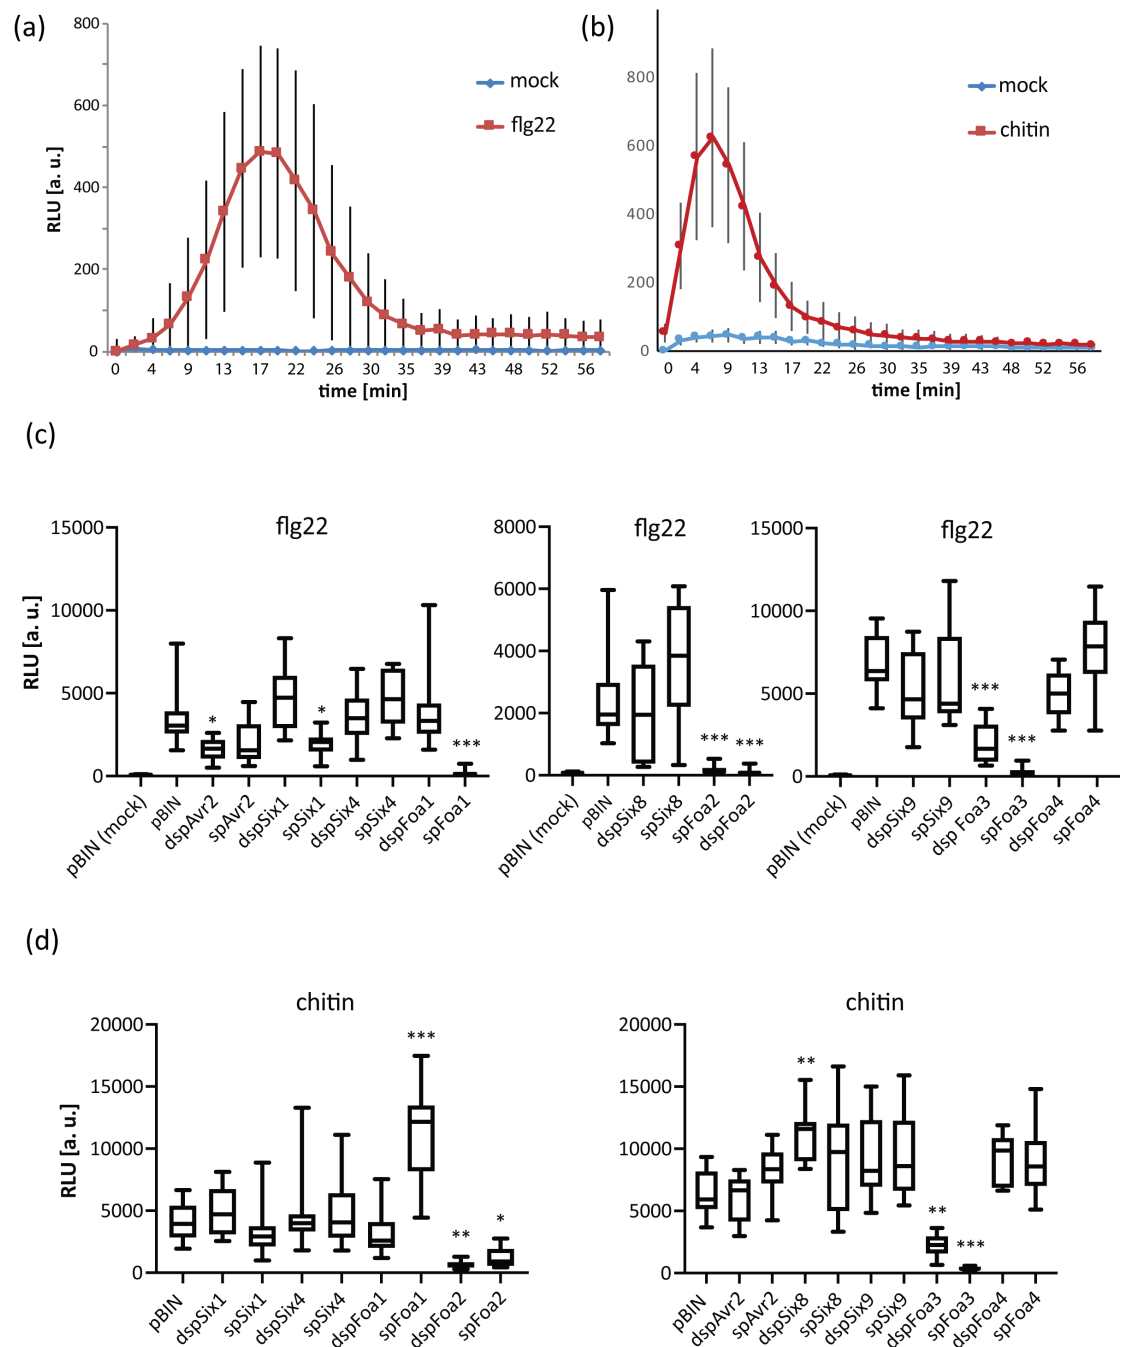

Fig S1 Flg22- and chitin-triggered reactive oxygen species (ROS) generation in *N. benthamiana* leaves  
 (a,b) Time course showing ROS generation in mock-, flg22- and chitin-treated *N. benthamiana* leaf discs. Each value represents the average of 16 leaf discs. Error bars indicate standard deviation.  
 (c) Flg22-triggered reactive oxygen species (ROS) generation in *N. benthamiana* leaves expressing the various candidate effectors. Presence and absence of their signal peptide is indicated by the prefix 'sp' and 'dsp'. pBIN = empty vector control containing an *Agrobacterium* strain carrying a binary vector without insert.  
 (d) Chitin-triggered ROS generation in *N. benthamiana* leaves expressing the various candidate effectors. Statistically significant differences to the flg22- and

chitin-treated empty vector controls are indicated (one way ANOVA, (\*) =  $P < 0,05$ ; (\*\*) =  $p < 0,01$ ; (\*\*\*) =  $p < 0,001$ ). Boxes extend from the 25<sup>th</sup> to the 75<sup>th</sup> percentile, whiskers from lowest to highest values, bar indicates the median; n = 16 leaf discs.

Fig. S2

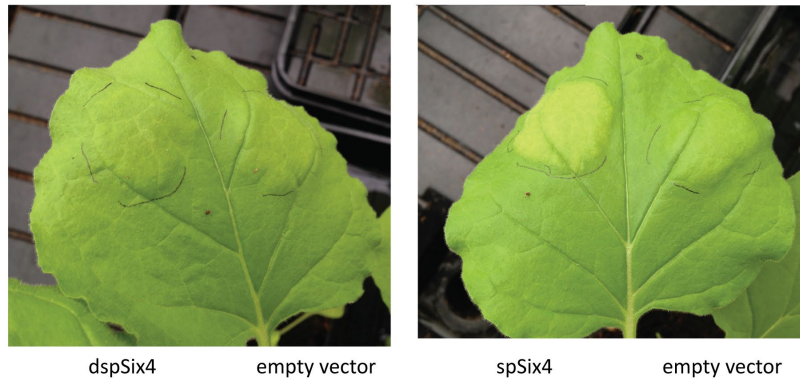

Fig S2 Expression of spSix4 leads to chlorosis in *N. benthamiana* leaves. Agrobacteria containing binary plasmids carrying either the *dspSix4* or *spSix4* gene, or an empty vector, were infiltrated into the encircled leaf areas. Pictures were taken 6 days post infiltration.

Fig. S3

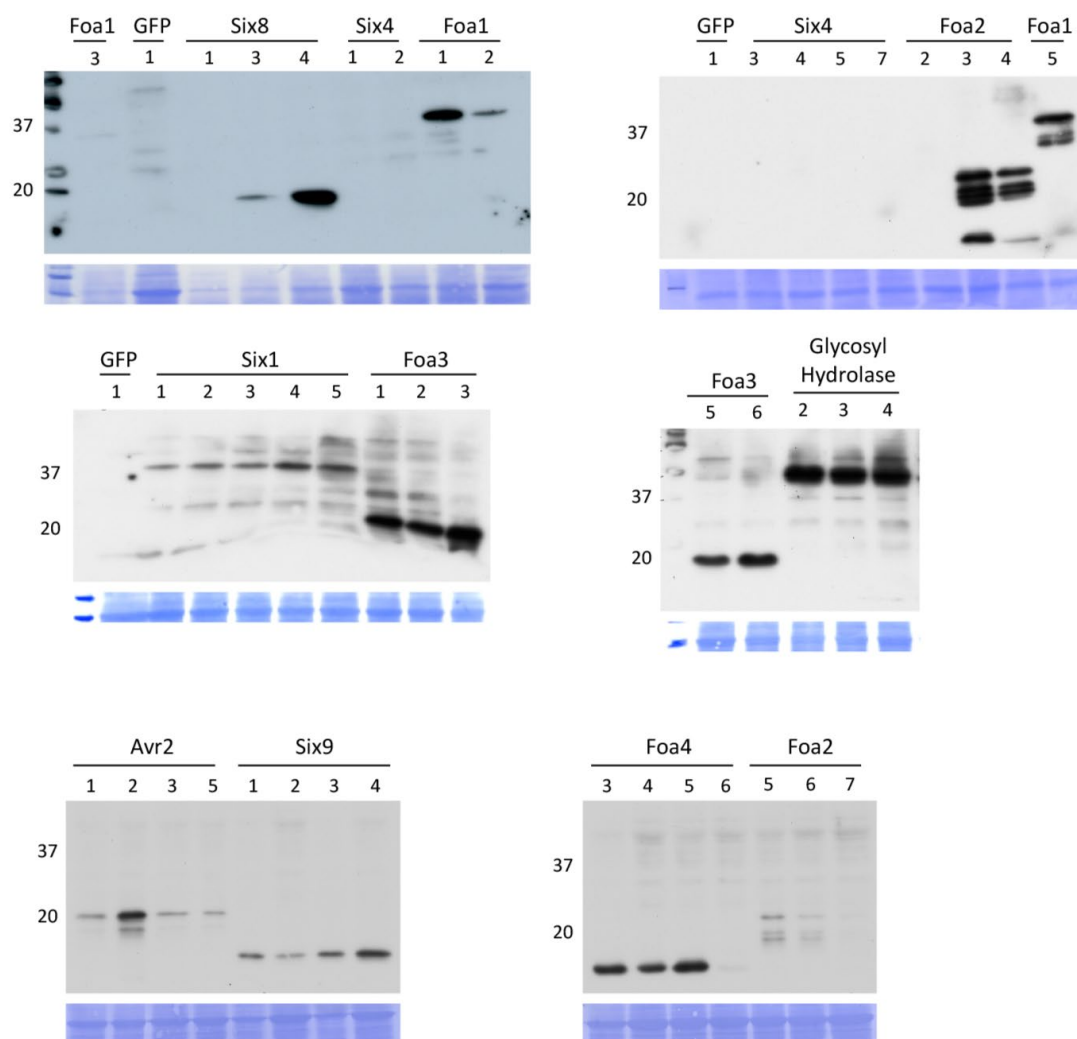

Fig S3 Accumulation of HA-Avi-tagged effectors in Arabidopsis seedlings inoculated with transgenic *Fusarium oxysporum* strains producing the proteins indicated.

Fo5176 was transformed with constructs encoding Avi-tagged effectors and -enzymes. Independent transformants were used to inoculate Arabidopsis seedlings. Five days post inoculation, proteins were extracted and analyzed by SDS-PAGE and Western blotting. Each lane contains proteins from seedlings inoculated with a specific *Fo* transformant (individual transformants are indicated by the numbers above the blots). Protein blots were probed with rat anti-HA antibodies. The molecular weight (kDa) marker is indicated at the left side of each membrane. Coomassie staining of the blots serves as loading control.

Fig. S4

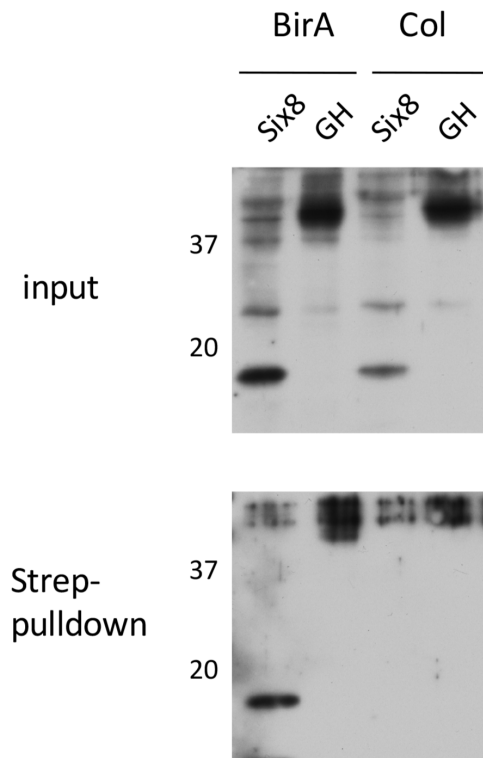

Fig S4 Biotinylation of Six8 requires the plant-produced BirA enzyme  
Wildtype and BirA-containing Col seedlings were inoculated with Fo5176 strains that secrete Avi-tagged Six8 or Avi-tagged Glycosyl Hydrolase (GH). Roots were harvested at six days post inoculation. Biotinylated proteins were isolated from total protein lysates (top panel) using magnetic Streptavidin beads (bottom panel). Protein blots were probed with rat anti-HA antibodies. The molecular weight (kDa) marker is indicated at the left side of the membrane.

Table S1 Primers used in this study

| Primer name                                                                          | target gene               | Sequence (5'-3')                                                                                                    |
|--------------------------------------------------------------------------------------|---------------------------|---------------------------------------------------------------------------------------------------------------------|
| HA-BLRP+                                                                             | HA-Avi-tag                | TTCTTGTCTAGAGGCGCGCCTACCCATATGACGTTCCAGATTAC<br>GCAGGACTTAATGACATCTTTGAGGCACAAAAGATCGAATGGC<br>ATGAGTAAAGATCTGTTGTT |
| HA-BLRP-                                                                             | HA-Avi-tag                | AACAACAGATCTTTACTCATGCCATTTCGATCTTTTGTGCCTCA<br>AAGATGTCATTAAGTCTGCGTAATCTGGAACGTCATATGGGT<br>AGGCGCGCCTCTAGACAAGAA |
| N036_HB_xma1                                                                         | HA-Avi-tag with XmaI site | AACAACCCCGGGTTACTCATGCCATTC                                                                                         |
| N037_HB_xba1                                                                         | HA-Avi-tag with XbaI site | TTCGACAAATCTAGAGGCGC                                                                                                |
| FoaSIX1pfor                                                                          | Six1 promoter             | ttcttgaagcttCGCGGCAATTCCTCTTGGAACATCG                                                                               |
| FoaSIX1prev                                                                          | Six1 promoter             | taagaatctagaTTTGTGCGAAAGCTCAAATCC                                                                                   |
| <b>Primers for amplifying effectors and controls, including their signal peptide</b> |                           |                                                                                                                     |
| SIX1-Asc1for                                                                         | SIX1                      | ttctcaGGCGCGCCATGGCGCCTATAGCATGG                                                                                    |
| SIX1-Asc1rev                                                                         |                           | tggaaaGGCGCGCCcGTAGGGGACATAGGGGCTGGT                                                                                |
| SIX4-Asc1for                                                                         | SIX4                      | ttctcaGGCGCGCCATGAATCTCAAGGCACTCG                                                                                   |
| SIX4-Asc1rev                                                                         |                           | tggaaaGGCGCGCCcAGCTAAGTTAAGTGTACCT                                                                                  |
| SIX8-Asc1for                                                                         | SIX8                      | ttctcaGGCGCGCCATGCAACCCTACGCGTTC                                                                                    |
| SIX8-Asc1rev                                                                         |                           | tggaaaGGCGCGCCcGAAATTGTTTATAAACTGGAC                                                                                |
| N029_Six9a_for                                                                       | SIX9                      | ttctcaGGCGCGCCATGAGGCTTCTGCAGTTGC                                                                                   |
| N030_Six9a_rev                                                                       |                           | tggaaaGGCGCGCCcATTCCGGGTGCATTGTCCCA                                                                                 |
| Foa1_Fom6for                                                                         | FOA1                      | ttctcaGGCGCGCCATGGTCGCCATCACTCTG                                                                                    |
| Foa1_Fom6rev                                                                         |                           | tggaaaGGCGCGCCcAGATCTCAAGATGTCATAG                                                                                  |
| N019_Foa2_for                                                                        | FOA2                      | ttctcaGGCGCGCCATGTTCTTCATTAACCAATC                                                                                  |
| N020_Foa2_rev                                                                        |                           | tggaaaGGCGCGCCcCATGTCTCTAATAATATACG                                                                                 |
| N023_Foa3_for                                                                        | FOA3                      | ttctcaGGCGCGCCATGGAGTCTTACAAAAGTCTG                                                                                 |
| N024_Foa3_rev                                                                        |                           | tggaaaGGCGCGCCcAAATTTGCCACAACCCAGTTGG                                                                               |
| N025_Foa4_for                                                                        | FOA4                      | ttctcaGGCGCGCCATGAAGTTTCACTTCTCGC                                                                                   |
| N026_Foa4_rev                                                                        |                           | tggaaaGGCGCGCCcAGGAACTTCAGTCGGCAGC                                                                                  |
| N015_GH_for                                                                          | Glycosyl Hydrolase        | ttctcaGGCGCGCCATGCGCTTTTCAACCCTTCT                                                                                  |
| N016_GH_rev                                                                          |                           | tggaaaGGCGCGCCcGGTGCAGAATGCACCAGCAGG                                                                                |
| N041_Avr2HB_for2                                                                     | AVR2                      | tcaGGCGCGCCATGCGTTTCTTCTGCTTATAGC                                                                                   |
| N054_A2HB_r2                                                                         |                           | taaGGCGCGCCcATCCTCTGAGATAGTAAGATAG                                                                                  |
| N106_Cmu1_F                                                                          | CMU1                      | tcaGGCGCGCCatgaagttgagcgtgtccatc                                                                                    |
| N107_Cmu1_R                                                                          |                           | aaaGGCGCGCCcgggtgcacttgttggcgtggt                                                                                   |
| N104_Amd_F                                                                           | Amidase                   | tcaGGCGCGCCatgaagcttctcgggtgtcg                                                                                     |
| N105_Amd_R                                                                           |                           | aaaGGCGCGCCcaaagggcacgggaacgttacg                                                                                   |
| <b>Primers for amplifying effectors and controls, excluding their signal peptide</b> |                           |                                                                                                                     |
| N049_Six1dSP                                                                         | SIX1                      | ttctcaGGCGCGCCATGCAAGAGGCTGCGGTTGGGGA                                                                               |
| N050_Six4dSP                                                                         | SIX4                      | ttctcaGGCGCGCCATGCTTCAAAGGGGGAGGAGG                                                                                 |
| N051_Six8dSP                                                                         | SIX8                      | ttctcaGGCGCGCCATGACGCATATTGATAAGAGCC                                                                                |
| N055_Six9dSP                                                                         | SIX9                      | ttctcaGGCGCGCCATGCAGAATAGGAATATTCAAGTTGG                                                                            |
| N052_Foa1dSP                                                                         | FOA1                      | ttctcaGGCGCGCCATGTCCCTGCCGAAGTCGTACC                                                                                |
| N056_Foa2dSP                                                                         | FOA2                      | ttctcaGGCGCGCCATGAAGCCCTTACCTGAGAAATCTG                                                                             |
| N057_Foa3dSP                                                                         | FOA3                      | ttctcaGGCGCGCCATGGTGAATACAAGTGGGTTTTCCACC                                                                           |
| N058_Foa4dSP                                                                         | FOA4                      | ttctcaGGCGCGCCATGAGCTACAGCAAATGCCATTG                                                                               |
| N048_Avr2dSP                                                                         | AVR2                      | ttctcaGGCGCGCCATGCTACCTGTGGAAGATGCC                                                                                 |

Table S2 Candidate effectors and enzymes

| Name               | GeneBank ID  | origin                 | Nr. Amino acids | Nr. Cys residues | SignalP_score | SP_size | SP_seq                  |
|--------------------|--------------|------------------------|-----------------|------------------|---------------|---------|-------------------------|
| Six1               | FOXB_01734   | <i>Fo5176</i>          | 279             | 9                | 0.772         | 21      | mapysmvlfgalsilfgaya    |
| Six4               | FOXB_04209   | <i>Fo5176</i>          | 242             | 6                | 0.648         | 17      | mnkalvviavsvavtsa       |
| Six8               | FOXB_13262   | <i>Fo5176</i>          | 141             | 2                | 0.821         | 18      | mqplrvllfplavsvaa       |
| Six9               | FOXB_17801   | <i>Fo5176</i>          | 118             | 6                | 0.544         | 19      | mrlsavaatafaifstaea     |
| Foa1               | FOXB_16439   | <i>Fo5176</i>          | 263             | 8                | 0.776         | 21      | mvaitlklvlagvaafiaivna  |
| Foa2               | FOXB_15742   | <i>Fo5176</i>          | 172             | 2                | 0.682         | 20      | mffikpifvafsfyialita    |
| Foa3               | FOXB_16928   | <i>Fo5176</i>          | 200             | 6                | 0.885         | 23      | mesykslmsllllfthlahlaqa |
| Foa4               | FOXB_14349   | <i>Fo5176</i>          | 103             | 8                | 0.803         | 19      | mkvslallalstcasaca      |
| Avr2               | FOXG_16398.3 | <i>Fol</i>             | 163             | 2                | 0.886         | 19      | mrflilliamsmtwvcsiag    |
| Glycosyl Hydrolase | FOXB_15917   | <i>Fo5176</i>          | 381             | 9                | 0.518         | 17      | mrfspllfgsfiasafa       |
| Amidase            | FOXG_11632   | <i>Fol</i>             | 585             | 6                | 0.71          | 19      | mkllglslatgliaqgvsa     |
| Cmu1               | UMAG_05731   | <i>Ustilago maydis</i> | 290             | 2                | 0.784         | 21      | mklsvsifvllavsafgggsa   |
